# Supplementary material
Source: Springer Nature journal article supplement (https://www.springermedizin.de/resource/supplementary/12887_2014_1206_MOESM7_ESM.pdf/9476674)
Supplement: MOESM7 [file 9476674]

# REVIEW QUESTION

What is known about the barriers to, and facilitators of, providing optimal care and management for children and young people with T1D within educational settings?

## SCREENING EXERCISE

1. Systematic and exhaustive searches to identify all relevant research
2. Retrieval, screening and classification of full reports

**Agreement on key questions, review scope and focus amongst co-applicants**  
Focus for in-depth review prioritized by study type

**Stream 1:**  
'Intervention studies'

**Stream 2:**  
'Non intervention studies'

## IN-DEPTH REVIEW

Conducted within study type

**Stream 1:**  
'Intervention studies'

1. Application of inclusion criteria
2. Data extracted from studies to describe characteristics and assess methodological quality
3. Data extracted on study findings
4. Findings synthesized to answer sub-question:

Which interventions are effective for optimising the care and management of children and young people with T1D in educational settings?

**Stream 2:**  
'Non intervention studies'

1. Application of inclusion criteria
2. Data extracted from studies to describe characteristics and assess methodological quality
3. Data extracted on study findings
4. Findings synthesized to answer sub-questions:

What are the attitudes and experiences of children and young people with T1D and those involved with their care and management in educational settings?

What are the barriers and facilitators to achieving optimal T1D management in educational settings?

## Stream 3: IN-DEPTH REVIEW Conducted across study type

Synthesis across study types to answer sub question:  
'To what extent do interventions address the barriers identified build upon the facilitators for providing optimal care and management of children and young people with T1D in educational settings?'
